# Supplementary figures and images for: Isofraxidin targets the TLR4/MD-2 axis to prevent osteoarthritis development
Source: Royal Society of Chemistry journal article supplement (doi:10.1039/c8fo01445k), 2018-01-01

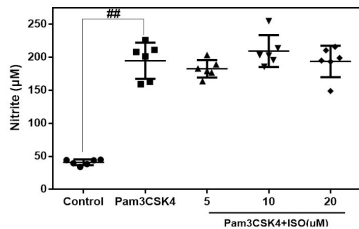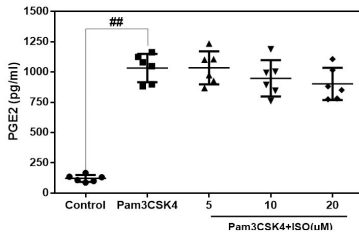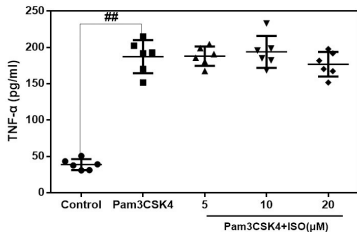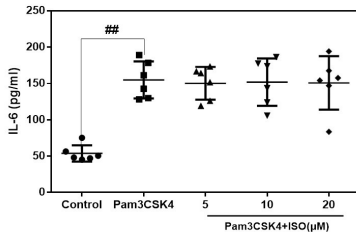

Supplement: c8fo01445k1.pdf [file c8fo01445k1.pdf]
